# Supplementary material
Source: PubMed Central journal article supplement (PMC4048825)

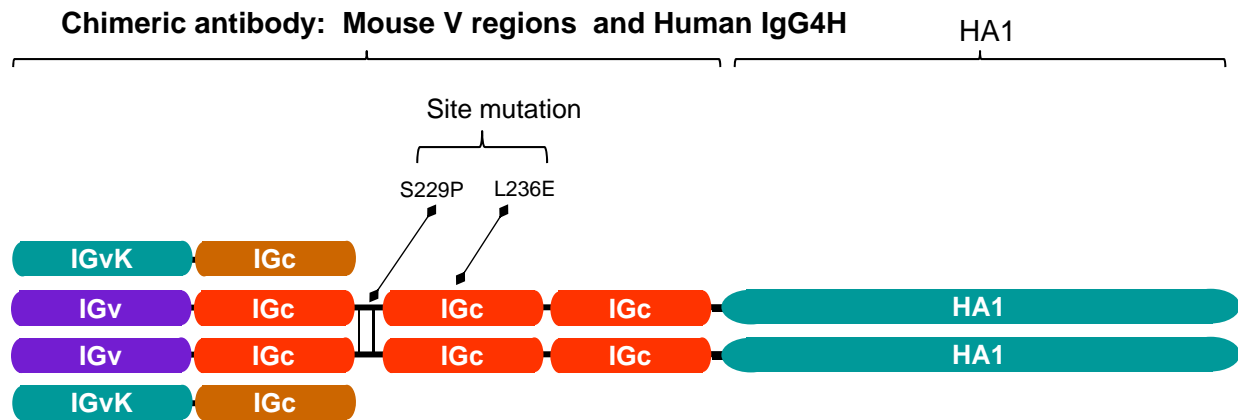

Supplemental FIGURE 1

Recombinant fusion protein of chimeric monoclonal antibody and HA1.

Supplement: NIHMS587974-supplement-1.pdf [file NIHMS587974-supplement-1.pdf]
